# Supplementary material
Source: PubMed Central journal article supplement (PMC2643653)
Supplement: IAI.01129-08_1.pdf [file IAI.01129-08_1.pdf]

## **SUPPLEMENTARY MATERIAL**

### **IgG subclass-specific responses against *Plasmodium falciparum* merozoite antigens are associated with control of parasitemia and protection from symptomatic illness**

Danielle I. Stanistic, Jack S. Richards, Fiona J. McCallum, Pascal Michon, Christopher L. King, Sonja Schoepflin, Paul R. Gilson, Vincent J. Murphy, Robin F. Anders, Ivo Mueller, James G. Beeson.

**Table S1:** Characteristics of antibody responses to *P. falciparum* merozoite antigens among the longitudinal cohort of children.

|                  | <b>n</b> | <b>Proportion Positive (%)<sup>1</sup></b> | <b>Median<sup>2</sup></b> | <b>IQR<sup>2</sup></b> | <b>T33<sup>2</sup></b> | <b>T67<sup>2</sup></b> |
|------------------|----------|--------------------------------------------|---------------------------|------------------------|------------------------|------------------------|
| <b>AMA-1</b>     |          |                                            |                           |                        |                        |                        |
| IgG              | 206      | 99.5                                       | 0.85                      | [0.46, 1.10]           | 0.60                   | 1.01                   |
| IgG1             | 206      | 94.2                                       | 0.97                      | [0.45, 1.26]           | 0.70                   | 1.17                   |
| IgG3             | 206      | 76.2                                       | 0.09                      | [0.02, 1.43]           | 0.02                   | 0.30                   |
| <b>MSP1-19</b>   |          |                                            |                           |                        |                        |                        |
| IgG              | 206      | 96.6                                       | 1.19                      | [0.43, 1.68]           | 0.76                   | 1.51                   |
| IgG1             | 206      | 69.9                                       | 0.17                      | [0.03, 0.77]           | 0.06                   | 0.52                   |
| IgG3             | 206      | 63.6                                       | 0.03                      | [0.01, 0.11]           | 0.01                   | 0.06                   |
| <b>MSP2 3D7</b>  |          |                                            |                           |                        |                        |                        |
| IgG              | 206      | 85.9                                       | 0.54                      | [0.25, 0.79]           | 0.36                   | 0.69                   |
| IgG1             | 206      | 41.3                                       | 0.01                      | [0.00, 0.02]           | 0.00                   | 0.02                   |
| IgG3             | 203      | 84.2                                       | 0.74                      | [0.20, 1.18]           | 0.39                   | 1.09                   |
| <b>MSP2 FC27</b> |          |                                            |                           |                        |                        |                        |
| IgG              | 206      | 83.0                                       | 0.30                      | [0.13, 0.60]           | 0.19                   | 0.49                   |
| IgG1             | 206      | 51.5                                       | 0.02                      | [0.01, 0.11]           | 0.01                   | 0.05                   |
| IgG3             | 202      | 80.7                                       | 0.70                      | [0.13, 1.11]           | 0.33                   | 0.98                   |

Notes:

1. Represents the proportion of samples that were classified as positive to each antigen (defined as optical density > mean + 3SD of the non-exposed control samples).

2. Values represent optical density measured by ELISA

Abbreviations: IQR, Inter-quartile range; T33: 33.33% tertile, T67: 66.67% tertile; AMA-1, Apical Membrane Antigen 1; MSP1-19, 19kDa C-terminal region of Merozoite Surface Protein 1; MSP2, Merozoite Surface Protein 2 (3D7 and FC27 alleles).

**Table S2:** The prevalence of IgG1 and IgG3 to merozoite antigens of *P. falciparum* among the longitudinal cohort of children in relation to age and infection.

| <b>Antigens</b>  | <b>Prevalence<sup>1</sup><br/>&lt;=9 yrs (%)</b><br>n = 91 | <b>Prevalence<br/>&gt;9 yrs (%)</b><br>n = 115 | <b>p-<br/>value<sup>3</sup></b> | <b>Prevalence<br/>Pf pos<br/>(%)<sup>2</sup></b><br>n = 139 | <b>Prevalence<br/>Pf neg (%)</b><br>n = 67 | <b>p-<br/>value</b> |
|------------------|------------------------------------------------------------|------------------------------------------------|---------------------------------|-------------------------------------------------------------|--------------------------------------------|---------------------|
| <b>AMA-1</b>     |                                                            |                                                |                                 |                                                             |                                            |                     |
| IgG1             | 87.9                                                       | 99.1                                           | 0.001                           | 97.8                                                        | 86.6                                       | 0.001               |
| IgG3             | 62.6                                                       | 87.0                                           | <0.001                          | 83.5                                                        | 61.2                                       | <0.001              |
| <b>MSP1-19</b>   |                                                            |                                                |                                 |                                                             |                                            |                     |
| IgG1             | 59.3                                                       | 78.3                                           | 0.003                           | 75.5                                                        | 58.2                                       | 0.011               |
| IgG3             | 51.7                                                       | 73.0                                           | 0.002                           | 72.7                                                        | 44.8                                       | <0.001              |
| <b>MSP2 3D7</b>  |                                                            |                                                |                                 |                                                             |                                            |                     |
| IgG1             | 42.9                                                       | 40.0                                           | 0.679                           | 48.2                                                        | 26.9                                       | 0.004               |
| IgG3             | 73.0                                                       | 93.0                                           | <0.001                          | 87.6                                                        | 77.3                                       | 0.059               |
| <b>MSP2 FC27</b> |                                                            |                                                |                                 |                                                             |                                            |                     |
| IgG1             | 45.1                                                       | 56.5                                           | 0.102                           | 59.7                                                        | 34.3                                       | 0.001               |
| IgG3             | 68.9                                                       | 90.2                                           | <0.001                          | 82.6                                                        | 76.6                                       | 0.311               |

Notes:

1. Samples were classified as positive if the optical density was greater than the mean + 3SD of the non-exposed control samples. Children were divided into 2 age groups: >9 and <9 years to determine the effect of age on the IgG subclass response.

2. *P. falciparum* infection was detected by PCR.

3. P values determined by Chi square test.

Abbreviations: Pf: *Plasmodium falciparum*; pos, positive; neg, negative; AMA-1, Apical Membrane Antigen 1; MSP1-19, 19kDa C-terminal region of Merozoite Surface Protein 1; MSP2, Merozoite Surface Protein 2 (3D7 and FC27 alleles).

## FIGURE LEGENDS FOR SUPPLEMENTARY FIGURES

Figure S1: The effect of exposure on the IgG subclass responses to merozoite antigens in Papua New Guinean children. IgG1: unshaded bars; IgG3: light gray bars. Median ODs for IgG1 and IgG3; y error bars indicate lower and upper quartiles. Exposure was determined by antibody responsiveness to *P. falciparum* schizont extract; these responses were divided into quartiles (Q1-4, where Q1 is the lowest quartile).

Figure S2: Changes to IgG subclass antibody responses to different merozoite antigens in association with age for individuals 0-3 years (n=50), 4-6 years (n=48), 7-9 years (n=50) and >10 years (n=59). IgG1: unshaded bars; IgG3: light gray bars. Median ODs for IgG1 and IgG3; y error bars indicate lower and upper quartiles.

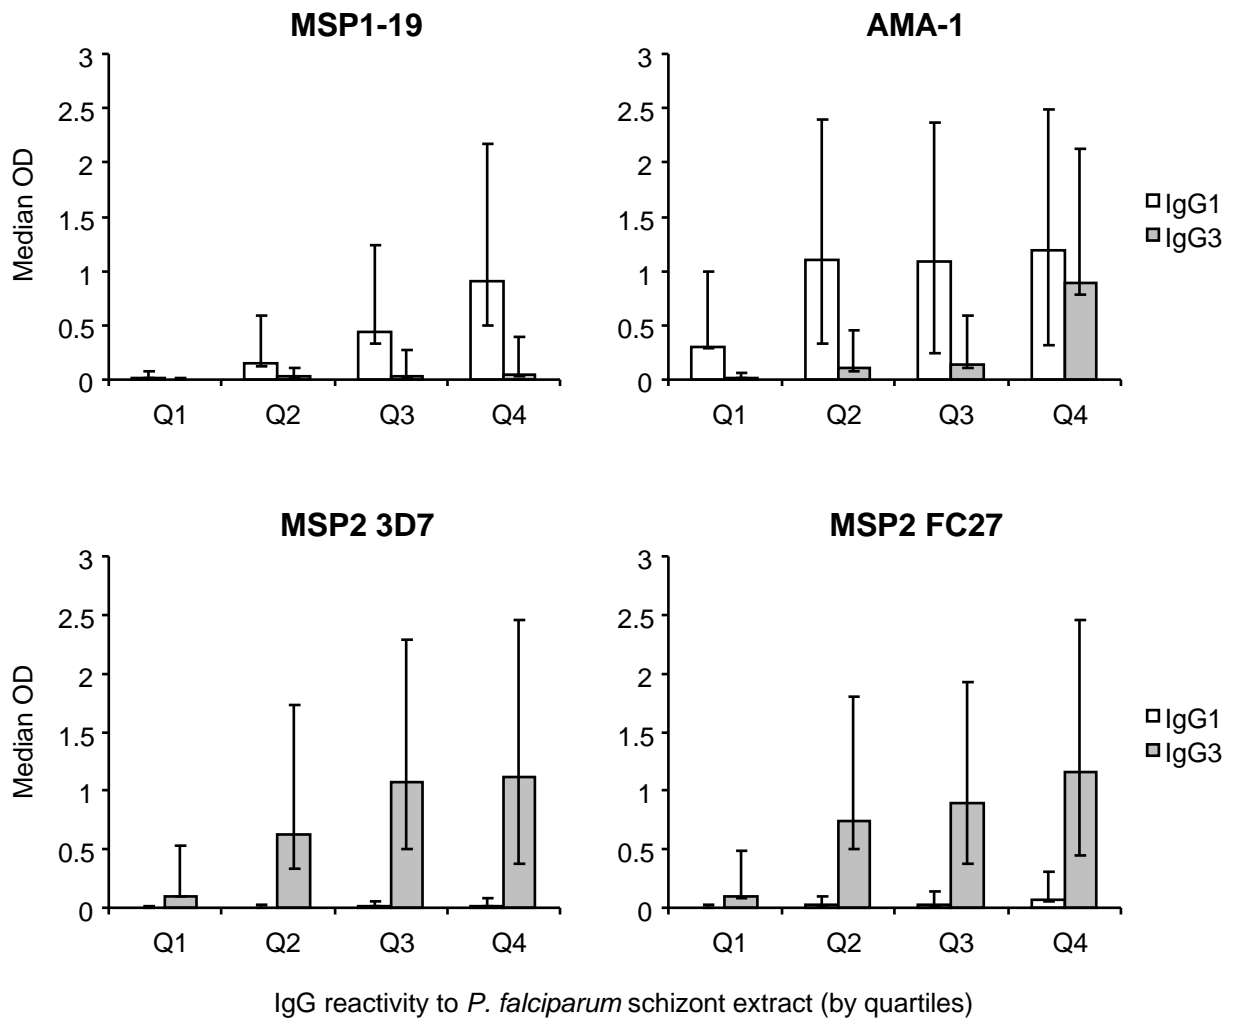

Supplementary Figure S1

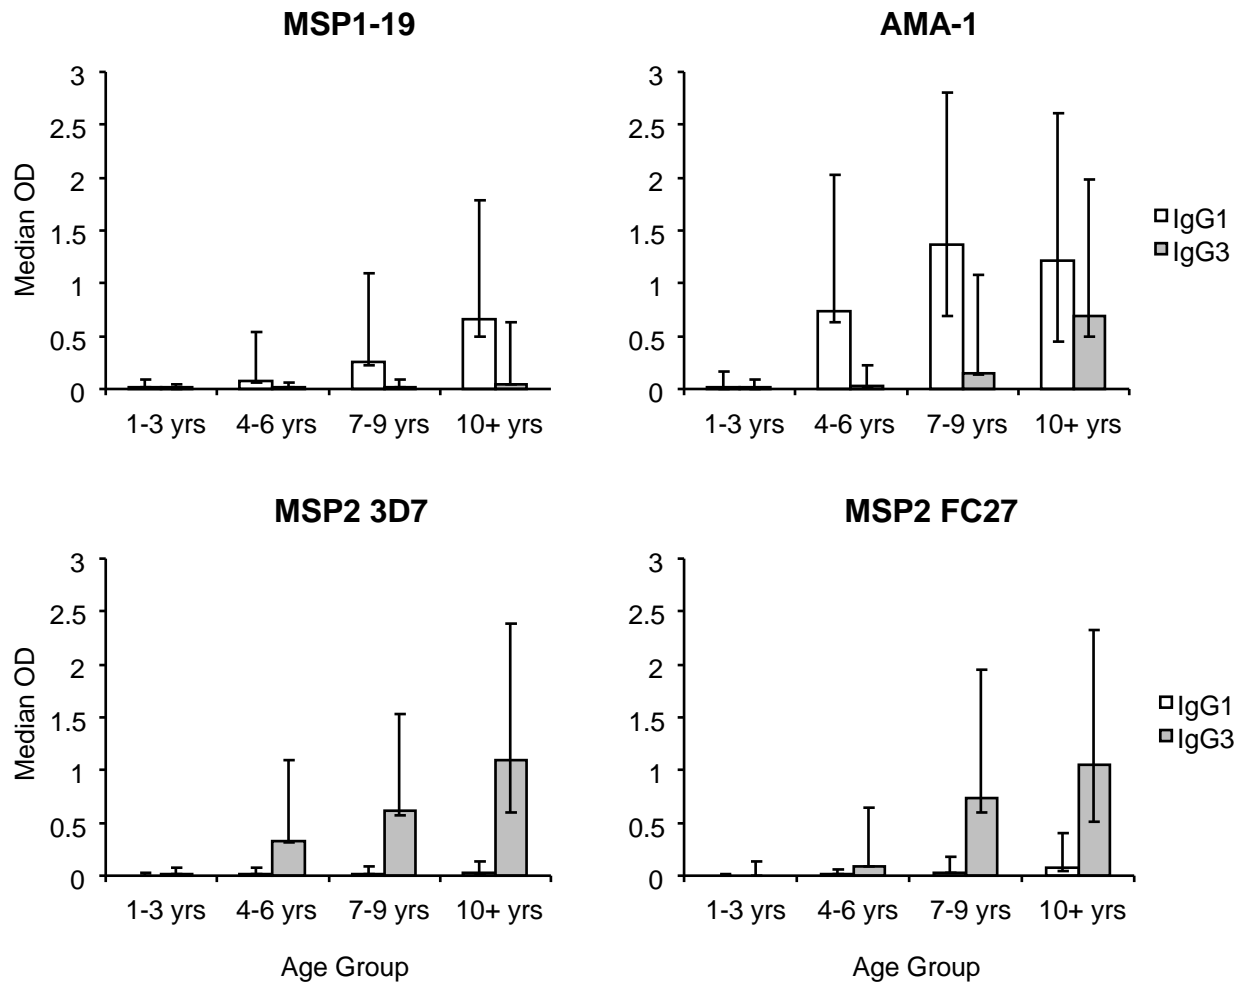

Supplementary Figure S2
